# Supplementary material for: Antifouling and antibacterial behavior of polyethersulfone membrane incorporating polyaniline@silver nanocomposites
Source: Royal Society of Chemistry journal article supplement (doi:10.1039/c6ew00332j), 2017-01-01
Supplement: c6ew00332j1.pdf [file c6ew00332j1.pdf]

## Supporting Information

### Antifouling and antibacterial behavior of polyethersulfone membrane incorporating polyaniline@silver nanocomposites

*Song Zhao<sup>\*† a</sup>, Lichuan Huang<sup>a</sup>, Tiezheng Tong<sup>b</sup>, Wen Zhang<sup>a</sup>, Zhi Wang<sup>a\*</sup>, Jixiao  
Wang<sup>a</sup>, Shichang Wang<sup>a</sup>*

<sup>a</sup> Chemical Engineering Research Center, School of Chemical Engineering and  
Technology, Tianjin University, Tianjin 300072, PR China

Tianjin Key Laboratory of Membrane Science and Desalination Technology, State  
Key Laboratory of Chemical Engineering (Tianjin University), Synergetic Innovation  
Center of Chemical Science and Engineering (Tianjin), Tianjin University, Tianjin  
300072, PR China

<sup>b</sup> Department of Chemical and Environmental Engineering, Yale University, New  
Haven, Connecticut 06520-8286, USA

---

<sup>\*</sup>Corresponding author at: Chemical Engineering Research Center, School of Chemical Engineering  
and Technology, Tianjin University, Weijin Road 92#, Nankai District, Tianjin 300072, PR China.  
Tel.: +86 02227404533. *E-mail address*: [songzhao@tju.edu.cn](mailto:songzhao@tju.edu.cn) (Song Zhao), [wangzhi@tju.edu.cn](mailto:wangzhi@tju.edu.cn) (Zhi  
Wang).

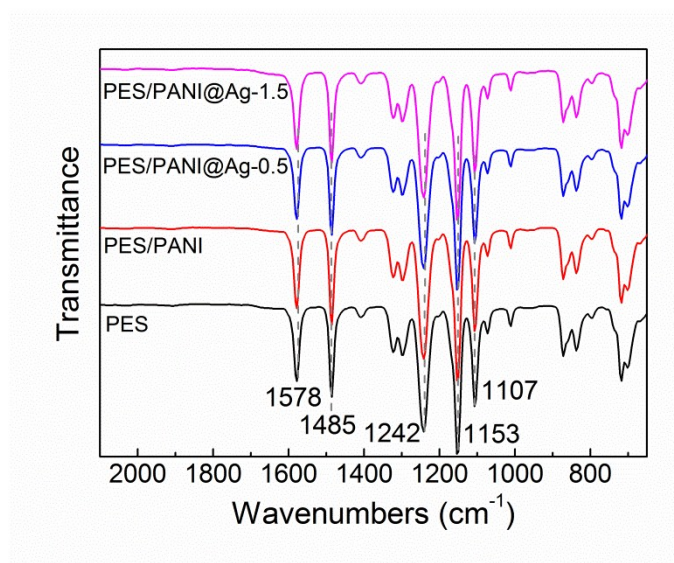

**Fig. S1** ATR-FTIR spectra of PES, PES/PANI and PES/PANI@Ag composite membranes.

Fig. S1 shows ATR-FTIR spectra of PES, PES/PANI and PES/PANI@Ag composite membranes. For all the membranes, the characteristic absorption bands corresponding to PES are observed at 1578  $\text{cm}^{-1}$  (benzene ring stretching), 1485  $\text{cm}^{-1}$  (C-C bond stretching), 1242  $\text{cm}^{-1}$  (aromatic ether stretching), 1153  $\text{cm}^{-1}$  (sulfonyl stretching) and 1107  $\text{cm}^{-1}$  (C-O bond stretching), respectively. After blending modification, there is no obvious difference observed between the spectra of PES, PES/PANI and PES/PANI@Ag membranes, probably because of the strong absorption bands of sulfones and secondary aromatic amines.

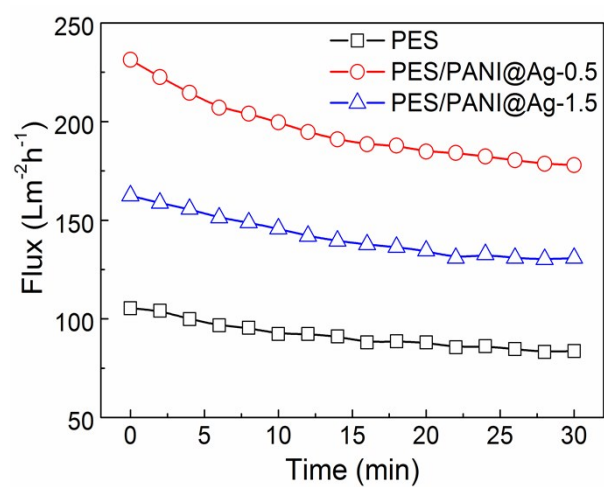

**Fig. S2** The time-dependent pure water fluxes of the membranes during membrane compaction at 0.30 MPa TMP.

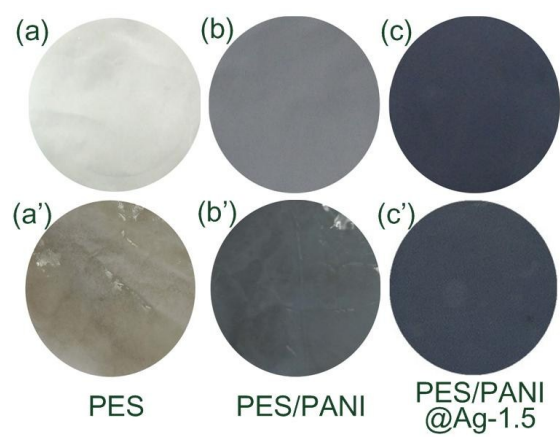

**Fig. S3** The digital photos of membranes before biofouling (a-c), and after biofouling (a'-c').
